# Supplementary material for: An Experimental Investigation on the Thermo-Rheological Behaviors of Lactic Acid-Based Natural Deep Eutectic Solvents
Source: MDPI journal article supplement (doi:10.3390/ma15114027), 2022-06-06
Supplement: s1 [file s1]

*An experimental investigation on the thermo-rheological behaviors of lactic acid based natural deep eutectic solvents*

*Yousef Elhamarnah<sup>b</sup>, Wadha Almarri<sup>b</sup>, Asma Albadr<sup>b</sup>, Alanoud Almalki<sup>b</sup>, Mashael AlRasheedi<sup>b</sup>, Nora Mohamed<sup>b</sup>, Izzah Fatima<sup>b</sup>, Mustafa Nasser<sup>ab\*</sup>, Hazim Qiblawey<sup>b</sup>*

*<sup>a</sup> Gas Processing Center, College of Engineering, Qatar University, Doha, Qatar*

*<sup>b</sup> Department of Chemical Engineering, College of Engineering, Qatar University, Doha, Qatar*

*Corresponding Author: Mustafa Nasser [m.nasser@qu.edu.qa](mailto:m.nasser@qu.edu.qa)*

**Supplementary information**

**Table S1:** Shear flow parameters

| Parameter                 | value            |
|---------------------------|------------------|
| Shear rate (1/s)          | 0.01-1000        |
| Data points               | 50               |
| Single point duration (s) | 12               |
| Temperature range (°C)    | 25, 45,65,85,105 |

**Table S2:** Pre-Shear flow parameters

| Parameter                  | value           |
|----------------------------|-----------------|
| Shear rate (1/s)           | 0.01 (constant) |
| Data points rate (point/s) | 5               |

**Table S3:** Oscillatory shear flow parameters

| Parameter                         | value            |
|-----------------------------------|------------------|
| Shear strain (%)                  | 10 (oscillating) |
| Data points rate (Point/s)        | 25               |
| Initial angular frequency (rad/s) | 100              |
| Final angular frequency (rad/s)   | 0.1              |

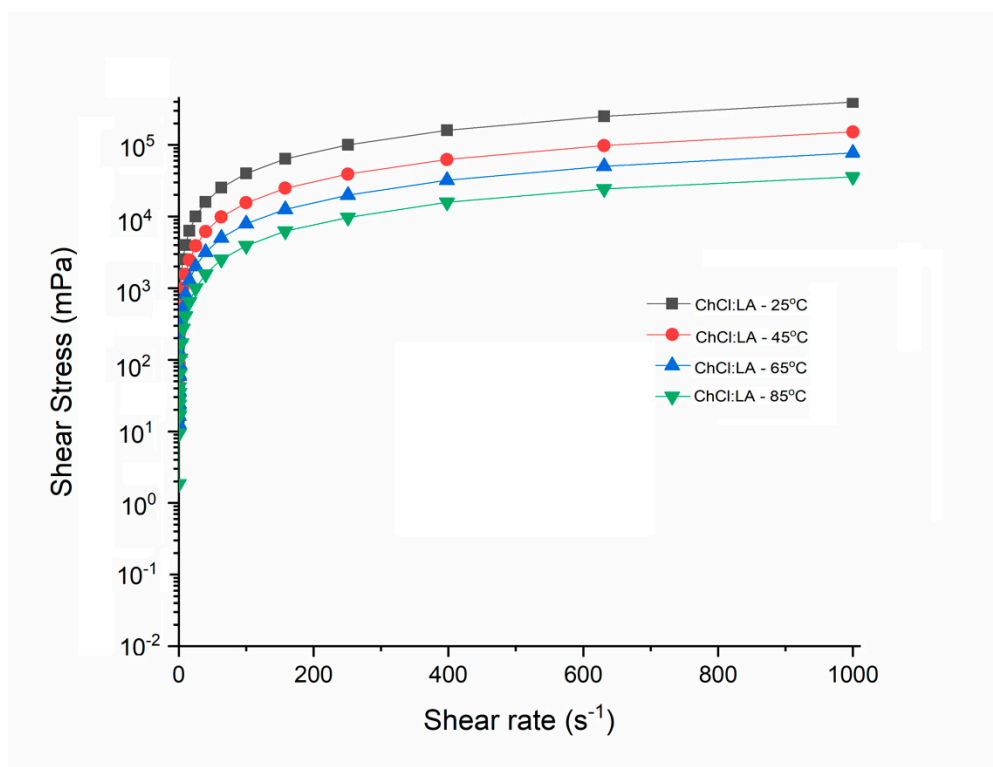

**Figure S1.** The variation of shear stress as a function of applied shear rate for ChCl:LA NADES systems at different temperatures from 25-85 °C

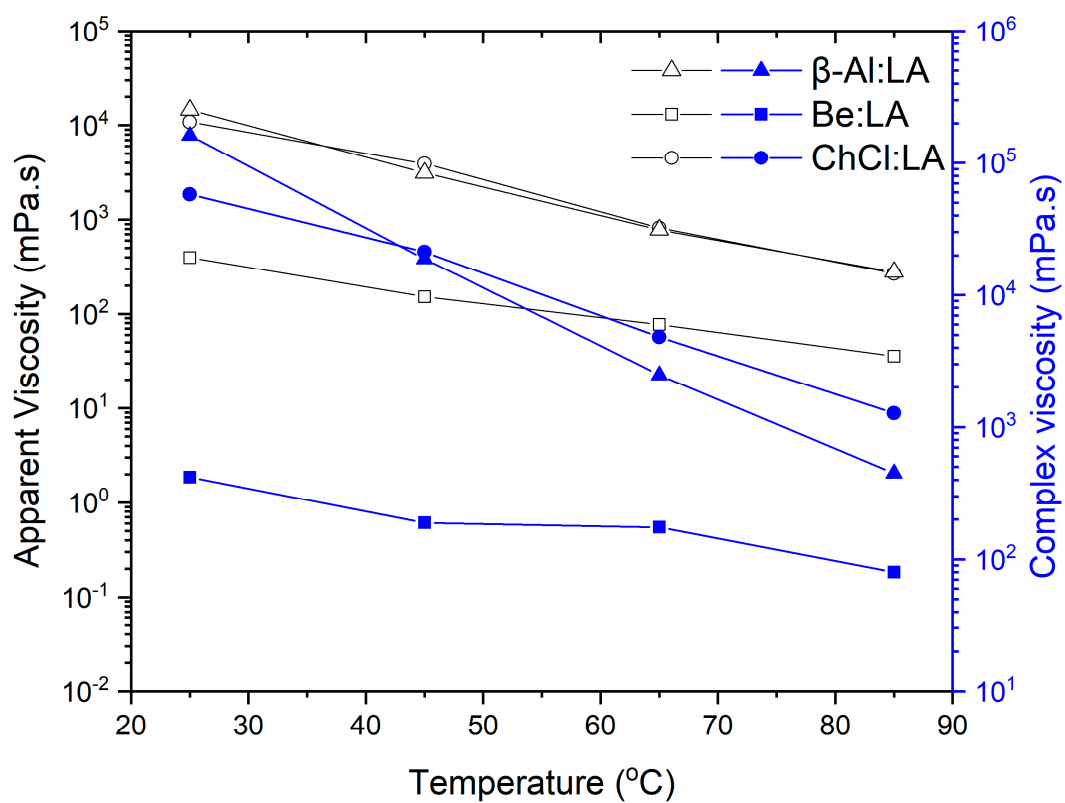

**Figure S2.** Complex viscosity & apparent viscosity variation for Be, B-Al, ChCl:LA NADES systems at high angular frequency (100 rad. s<sup>-1</sup>) and high shear rate (1000 s<sup>-1</sup>) under heating from ambient temperature conditions to 85°C

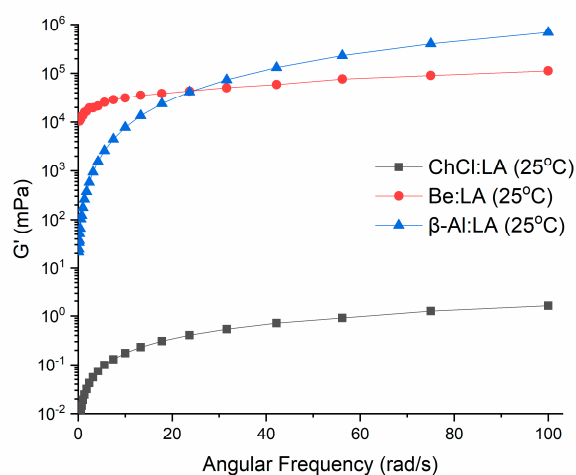

a

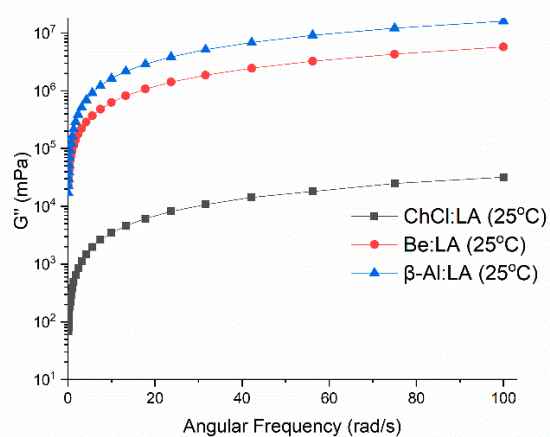

b

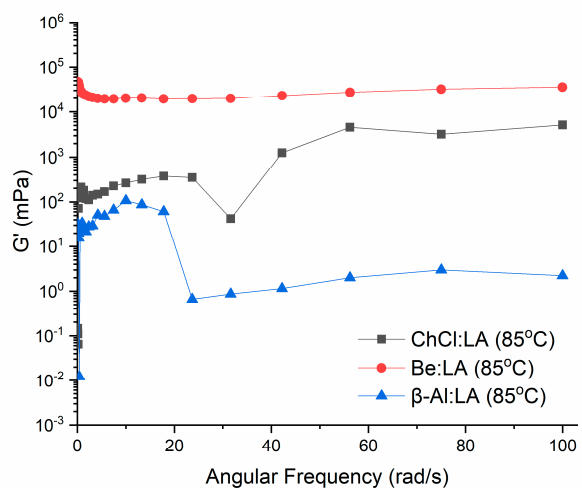

c

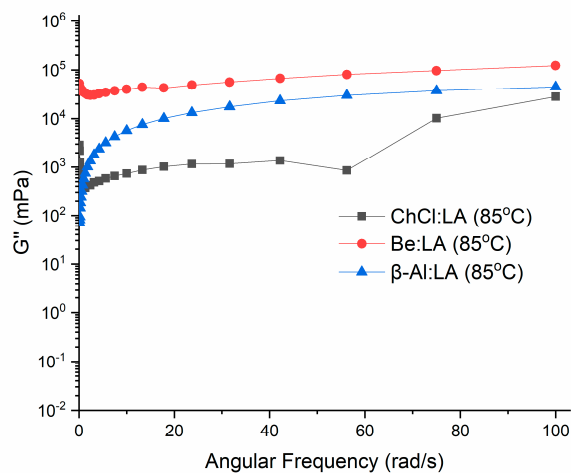

d

**Figure S3.** (a) The elastic modulus ( $G'$ ) at an angular frequency range from 0.1–100  $\text{rad} \cdot \text{s}^{-1}$  for Be, B-Al, and ChCl:LA at room temperature conditions. (b) The viscous modulus ( $G''$ ) at an angular frequency range from 0.1–100  $\text{rad} \cdot \text{s}^{-1}$  for Be, B-Al, and ChCl:LA at room temperature conditions. (c) The elastic modulus ( $G'$ ) at an angular

frequency range from 0.1–100 rad. s<sup>-1</sup> for Be, B-Al, and ChCl:LA at high temperature. (d) The viscous modulus ( $G''$ ) at an angular frequency range from 0.1–100 rad. s<sup>-1</sup> for Be, B-Al, and ChCl:LA at high temperature.

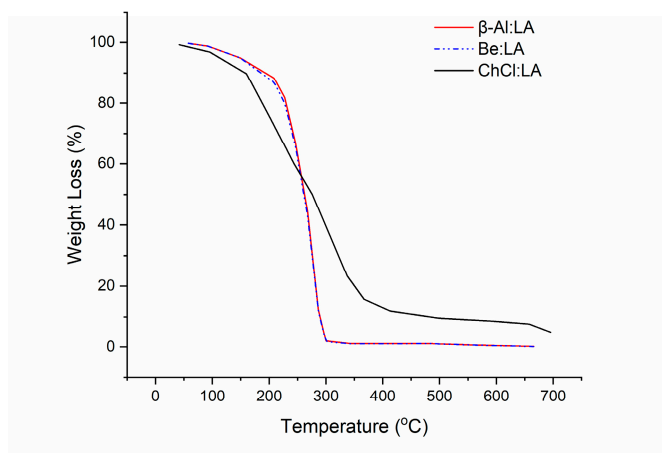

**Figure S4.** TGA thermographs of LA-based NADES systems.
